# Supplementary material
Source: PubMed Central journal article supplement (PMC3590084)
Supplement: supp_2012.072207_2012.072207.IOLASCON_SUPPL.pdf [file supp_2012.072207_2012.072207.IOLASCON_SUPPL.pdf]

## Clinical aspects and pathogenesis of congenital dyserythropoietic anemias: from morphology to molecular approach

Achille Iolascon,<sup>1,2</sup> Maria Rosaria Esposito,<sup>2</sup> and Roberta Russo<sup>1,2</sup>

<sup>1</sup>Department of Biochemistry and Medical Biotechnologies, University of Naples Federico II, Naples; and <sup>2</sup>CEINGE Biotechnologie Avanzate, Naples, Italy

Citation: Iolascon A, Esposito MR, and Russo R. Clinical aspects and pathogenesis of congenital dyserythropoietic anemias: from morphology to molecular approach. *Haematologica* 2012;97(12): 1786-1794. doi:10.3324/haematol.2012.072207

Online Supplementary Table 1S. Mutational spectrum of *CDAN1/CDAN2*

| Gene                        | Exon            | Nucleotide change <sup>a/c</sup> | Legacy name <sup>a/b</sup> | Reference   |          |
|-----------------------------|-----------------|----------------------------------|----------------------------|-------------|----------|
| <b>CDAN1</b><br>(54 cases)  | <i>missense</i> |                                  |                            |             |          |
|                             | 2               | c.156 C>G                        | F52L                       | (Ref. 2)    |          |
|                             | 6               | c.1078 T>C                       | F360L                      | (Ref. 4)    |          |
|                             | 12              | c.1796 A>G                       | N599S                      | (Ref. 1)    |          |
|                             | 14              | c.2015 C>T                       | P672L                      | (Ref. 1)    |          |
|                             | 14              | c.2062 C>T                       | R688W                      | (Ref. 2)    |          |
|                             | 14              | c.2069 T>C                       | V690A                      | (Ref. 5)    |          |
|                             | 14              | c.2092 G>A                       | E698K                      | (Ref. 1)    |          |
|                             | 14              | c.2140 C>T                       | R714W                      | (Ref. 1)    |          |
|                             | 14              | c.2173 C>T                       | R725W                      | (Ref. 4)    |          |
|                             | 15              | c.2248 G>T                       | G750C                      | (Ref. 4)    |          |
|                             | 19              | c.2602 T>A                       | F868I                      | (Ref. 1)    |          |
|                             | 19              | c.2605 G>A                       | V869M                      | (Ref. 1)    |          |
|                             | 20              | c.2650 A>G                       | T884A                      | (Ref. 2)    |          |
|                             | 24              | c.3107 C>A                       | S1036F                     | (Ref. 1)    |          |
|                             | 24              | c.3124 C>T                       | R1042W                     | (Ref. 1)    |          |
|                             | 24              | c.3128 A>T                       | D1043V                     | (Ref. 1)    |          |
|                             | 24              | c.3194 G>A                       | R1065Q                     | (Ref. 4)    |          |
|                             | 26              | c.3389 C>T                       | P1130L                     | (Ref. 1)    |          |
|                             |                 | <i>nonsense</i>                  |                            |             |          |
|                             |                 | 14                               | c.2044 C>T                 | R682X       | (Ref. 1) |
|                             |                 | 18                               | c.2539 C>T                 | Q847X       | (Ref. 2) |
|                             |                 | 23                               | c.2992 C>T                 | R998X       | (Ref. 1) |
|                             |                 | 27                               | c.3547 C>T                 | Q1183X      | (Ref. 4) |
|                             |                 | <i>splicing</i>                  |                            |             |          |
|                             |                 | 8                                | c.1367+1 G>A               |             | (Ref. 2) |
|                             |                 | 12                               | c.1860+5 G>A               |             | (Ref. 2) |
|                             |                 | 21                               | c.2868+2 insCCG            |             | (Ref. 4) |
|                             |                 | 28                               | c.3558 del -10 to +31      |             | (Ref. 4) |
|                             |                 | <i>frameshift</i>                |                            |             |          |
|                             |                 | 23                               | c.3024 insTT               | G1008Gfs23X | (Ref. 4) |
|                             |                 | 24                               | c.3145 insT                | S1049Ffs25X | (Ref. 4) |
|                             |                 | <i>small deletion</i>            |                            |             |          |
|                             | 6               | c.1117_19delGTT                  | V373del                    | (Ref. 3)    |          |
|                             | 12              | c.1789_1791delGAG                | E597del                    | (Ref. 4)    |          |
| <b>CDAN2</b><br>(134 cases) | <i>missense</i> |                                  |                            |             |          |
|                             | 2               | c.40 C>T                         | R14W                       | (Ref. 7)    |          |
|                             | 2               | c. 53 G>A                        | R18H                       | (Ref. 7)    |          |

continued on the next page

Continued from the previous page

|                   |                       |            |           |
|-------------------|-----------------------|------------|-----------|
| 2                 | c.74 C>A              | P25H       | (Ref. 13) |
| 2                 | c.197 G>A             | C66Y       | (Ref. 8)  |
| 4                 | c.325 G>A             | E109K      | (Ref. 7)  |
| 6                 | c.640 C>T             | Q214X      | (Ref. 12) |
| 7                 | c.716 A>G             | D239G      | (Ref. 7)  |
| 8                 | c.938 G>A             | R313H      | (Ref. 7)  |
| 8                 | c.953T>C              | I318T      | (Ref. 7)  |
| 9                 | c.1043 A>C            | D348A      | (Ref. 6)  |
| 10                | c.1157 A>G            | Q386R      | (Ref. 7)  |
| 11                | c.1254 T>G            | I418M      | (Ref. 10) |
| 11                | c.1307 C>T            | S436L      | (Ref. 10) |
| 12                | c.1385 A>G            | Y462C      | (Ref. 7)  |
| 13                | c.1453 A>G            | T485A      | (Ref. 12) |
| 13                | c.1489 C>T            | R497C      | (Ref. 7)  |
| 13                | c.1508 G>A            | R503Q      | (Ref. 9)  |
| 14                | c.1571 C>T            | A524V      | (Ref. 7)  |
| 14                | c.1588 C>T            | R530W      | (Ref. 7)  |
| 14                | c.1589 G>A            | R530Q      | (Ref. 9)  |
| 14                | c.1654 C>T            | L552F      | (Ref. 10) |
| 15                | c.1685 A>G            | Y562C      | (Ref. 9)  |
| 15                | c.1733 T>C            | L578P      | (Ref. 10) |
| 15                | c.1735 T>A            | Y579N      | (Ref. 10) |
| 16                | c.1808 C>T            | S603L      | (Ref. 6)  |
| 16                | c.1832 G>C            | R611P      | (Ref. 10) |
| 16                | c.1858 A>G            | M620V      | (Ref. 10) |
| 17                | c.1910 T>G            | V637G      | (Ref. 12) |
| 17                | c.1968 T>G            | F656L      | (Ref. 9)  |
| 18                | c.2101 C>T            | R701C      | (Ref. 6)  |
| 18                | c.2129 C>T            | T710M      | (Ref. 11) |
| 19                | c.2166 A>C            | K723Q      | (Ref. 9)  |
| 19                | c.2180 C>T            | S727F      | (Ref. 12) |
| 20                | c.2270 A>C            | H757P      | (Ref. 10) |
| <i>nonsense</i>   |                       |            |           |
| 2                 | c.71 G>A              | W24X       | (Ref. 13) |
| 3                 | c.235 C>T             | R79X       | (Ref. 7)  |
| 5                 | c.367 C>T             | R123X      | (Ref. 10) |
| 5                 | c.568 C>T             | R190X      | (Ref. 6)  |
| 6                 | c.649 C>T             | R217X      | (Ref. 7)  |
| 7                 | c.790 C>T             | R264X      | (Ref. 7)  |
| 8                 | c.970 C>T             | R324X      | (Ref. 7)  |
| 9                 | c.1015 C>T            | R339X      | (Ref. 10) |
| 10                | c.1201C>T             | R401X      | (Ref. 7)  |
| 14                | c.1603 C>T            | R535X      | (Ref. 10) |
| 14                | c.1648 C>T            | R550X      | (Ref. 9)  |
| 14                | c.1660 C<T            | R554X      | (Ref. 6)  |
| <i>splicing</i>   |                       |            |           |
| 2                 | c.221+31 A>G          |            | (Ref. 10) |
| 3                 | c.279+3 A>G           |            | (Ref. 10) |
| 6                 | c.689+1 G>A           |            | (Ref. 7)  |
| 9                 | c.1109+1 G>A          |            | (Ref. 10) |
| 9                 | c.1109+5 G>A          |            | (Ref. 10) |
| 19                | c.2149-2 A>G          |            | (Ref. 10) |
| <i>frameshift</i> |                       |            |           |
| 3                 | c.222-817_366+4242del | Q75EfsX7   | (Ref. 7)  |
| 5                 | c.387(del G)          | L129LfsX26 | (Ref. 10) |

continued on the next page

|                       |                    |            |           |
|-----------------------|--------------------|------------|-----------|
| 5                     | c.428_428delAinsCG | D143AfsX35 | (Ref. 6)  |
| 9                     | c.1063delG         | D355IfsX8  | (Ref. 7)  |
| 16                    | c.1821delT         | H608IfsX7  | (Ref. 6)  |
| 17                    | c.1962-64 (delT)   | T654TfsX13 | (Ref. 9)  |
| 19                    | c.2150 (delC)      | A717VfsX7  | (Ref. 10) |
| <i>small deletion</i> |                    |            |           |
| 16                    | c.1857_1859delCAT  | I619del    | (Ref. 10) |

<sup>o</sup> CDAN1: the nucleotides are numbered from the A of the ATG initiation codon (ENST00000356231). All mutations have been revised according to the rules of nomenclature of the HGVS database (<http://www.hgvs.org/mutnomen/>). <sup>\*</sup> CDAN2: the nucleotides are numbered from the A of the ATG initiation codon (ENST00000377475) <sup>o</sup> CODANIN-1: Accession number: Q8IWIY9 (UniProtKB/Swiss-Prot). <sup>o</sup> SEC23B: Accession number: Q15437 (UniProtKB/Swiss-Prot).

## References

- Dgany O, Avidan N, Delaunay J, et al. Congenital dyserythropoietic anemia type I is caused by mutations in codanin-1. *Am J Hum Genet.* 2002;71(6):1467-74.
- Tamary H, Dgany O, Proust A, et al. Clinical and molecular variability in congenital dyserythropoietic anaemia type I. *Br J Haematol.* 2005;130(4):628-34.
- Ahmed MR, Chehal A, Zahed L et al. Linkage and mutational analysis of the CDAN1 gene reveals genetic heterogeneity in congenital dyserythropoietic anemia type I. *Blood.* 2006;107(12):4968-9.
- Heimpel H, Schwarz K, Ebnother M, et al. Congenital dyserythropoietic anemia type I (CDA I): molecular genetics, clinical appearance, and prognosis based on long-term observation. *Blood.* 2006;107(1):334-40.
- Ru YX, Zhu XF, Yan WW et al. Congenital dyserythropoietic anemia in a Chinese family with a mutation of the CDAN1-gene. *Ann Hematol.* 2008;87(9):751-4.
- Bianchi P, Fermo E, Vercellati C, et al. Congenital dyserythropoietic anemia type II (CDAII) is caused by mutations in the SEC23B gene. *Hum Mutat.* 2009;30(9):1292-8.
- Schwarz K, Iolascon A, Verissimo F, et al. Mutations affecting the secretory COPII coat component SEC23B cause congenital dyserythropoietic anemia type II. *Nat Genet.* 2009;41(8):936-40.
- Fermo E, Bianchi P, Notarangelo LD, et al. CDAII presenting as hydrops foetalis: molecular characterization of two cases. *Blood Cells Mol Dis.* 2010;45(1):20-2.
- Iolascon A, Russo R, Esposito MR, et al. Molecular analysis of 42 patients with congenital dyserythropoietic anemia type II: new mutations in the SEC23B gene and a search for a genotype-phenotype relationship. *Haematologica.* 2010;95(5):708-15.
- Russo R, Esposito MR, Asci R, et al. Mutational spectrum in congenital dyserythropoietic anemia type II: identification of 19 novel variants in SEC23B gene. *Am J Hematol.* 2010;85(12):915-20.
- Amir A, Dgany O, Krasnov T et al. E109K is a SEC23B founder mutation among Israeli Moroccan Jewish patients with congenital dyserythropoietic anemia type II. *Acta Haematol.* 2011;125(4):202-7.
- Punzo F, Bertoli-Avella AM, Scianguetta S, et al. Congenital dyserythropoietic anemia type II: molecular analysis and expression of the SEC23B gene. *Orphanet J Rare Dis.* 2011; 6:89.
- Liu G, Niu S, Dong A, et al. A Chinese family carrying novel mutations in SEC23B and HFE2, the genes responsible for congenital dyserythropoietic anaemia II (CDA II) and primary iron overload, respectively. *Br J Haematol.* 2012;158(1):143-5.
