# Supplementary material
Source: PubMed Central journal article supplement (PMC3590084)
Supplement: supp_2012.072207_2012_072207-Contributions.pdf [file supp_2012.072207_2012_072207-Contributions.pdf]

**Manuscript no. HAEMATOL/2012/072207 entitled “Clinical aspects and pathogenesis of CDAs: from morphology to molecular approach”**

**Authors: Achille Iolascon, Maria Rosaria Esposito, and Roberta Russo**

**Information about the contributions of each person named as having participated in the study**

**1) Guarantor(s)**, i.e., person(s) who is (are) responsible for the integrity of the work as a whole:  
• Achille Iolascon, Department of Biochemistry and Medical Biotechnologies, University of Naples Federico II, Naples, Italy and CEINGE Biotechnologie Avanzate, Naples, Italy,  
[achille.iolascon@unina.it](mailto:achille.iolascon@unina.it)

According to the International Committee of Medical Journal Editors (ICMJE) ([http://www.icmje.org/ethical\\_1author.html](http://www.icmje.org/ethical_1author.html)): “*Authorship credit should be based on: 1) substantial contributions to conception and design, acquisition of data, or analysis and interpretation of data; 2) drafting the article or revising it critically for important intellectual content; and 3) final approval of the version to be published. Authors should meet conditions 1, 2, and 3 ..... Acquisition of funding, collection of data, or general supervision of the research group alone does not constitute authorship*”.

The guarantors of this manuscript confirm that all persons designated as authors qualify for authorship, and that each author has participated sufficiently in the work to take public responsibility for appropriate portions of the content.

**2) Authors who participated in the conception of the study:** Achille Iolascon, Maria Rosaria Esposito, and Roberta Russo

**3) Design & Methods.** The following authors were responsible for specific investigations (please detail):

- Achille Iolascon was responsible for the structure of the review
- Maria Rosaria Esposito was responsible for collection of molecular data
- Roberta Russo were responsible for collection of clinical data

**4) Results.** The following authors were responsible for specific portions of the results, including figures and tables (please indicate the person responsible for each figure and each table):

- Achille Iolascon was responsible for Figure 1
- Maria Rosaria Esposito was responsible for Figure 3 and Table 1s
- Roberta Russo was responsible for Figure 2 and Table 1

**5) Writing the manuscript.** The following authors were responsible for writing the manuscript:

- Achille Iolascon was responsible for the part concerning the CDAI
- Maria Rosaria Esposito and Roberta Russo were responsible for the part concerning the CDAll and others forms

**6) Contributors Listed in Acknowledgments:**

This work was supported by Ministry of University and Research of Italy (MIUR), by Telethon (Italy) (GGP09044), by Contract grant number: MUR-PS 35-126/Ind, by Contract grant sponsor: Regione Campania, by Contract grant number: DGRC 1901/2009
